# Supplementary material
Source: Research Square preprint supplement (doi:10.21203/rs.3.rs-9869749/v1)
Supplement: Supplementary file 1 [file 25acc94e9616be66934f7483.pdf]

## Supplement Materials

### Supplement 1a: Literature Related to the Moderator Variables

#### *Demographic Moderators*

Research indicates that the impact of SES on individuals' lives varies across developmental stages and educational level (e.g., <sup>1,2</sup>). Hence, a primary goal of this meta-analysis is to explore the relationship between SES and self-concept throughout a student's developmental journey. Previous studies have shown a linear declining role of age in self-concept (e.g., <sup>3,4</sup>). Most research suggesting that the association between SES and self-concepts weakens with age has relied on longitudinal data where SES was measured only during the first phase/wave of the study, while self-concept was assessed repeatedly. However, there is a possibility of fluctuating SES over time, for instance, Hascoët et al. <sup>5</sup> showed the correlation coefficient between family incomes in the gap of four-years remained only .80. This change/fluctuation in SES was largely ignored in previous longitudinal studies, hence to get a more accurate relationship between SES and self-concept over various ages, the student's age is taken as a moderator variable. Notably, students' grade level was not included as a moderator in the analysis to avoid redundancy, given its high degree of overlap with age.

RQ: Does the association between family SES and students' self-concept weaken as age increases?

For decades, researchers have examined gender differences in self-concepts <sup>6-8</sup>. These studies consistently indicate that boys report higher math/science self-concept, whereas girls report higher verbal/language self-concept <sup>9-13</sup>. While these differences were primarily associated with gender role-specific domains, such as math, language, science, etc. <sup>8,12,14</sup>, recent research suggests that lower self-concept in females is not limited to male-dominated

domains and may extend throughout academic self-concepts<sup>15</sup>. Additionally, studies show that males typically exhibit higher physical self-concept<sup>16,17</sup>, while females often demonstrate superior emotional self-concept<sup>17</sup>. Overall, these results indicate an advantage for boys in academic and physical self-concept, except for domains such as language and emotional self-concept. However, research exploring gender differences in the relationship between SES and self-concept remains limited. Andersen and Smith<sup>14</sup> found that the association between SES and mathematical self-concept is stronger for boys, whereas for language self-concept, it is stronger for girls. Similarly, Chavous et al.<sup>18</sup> demonstrated a more robust association between SES and academic self-concept in boys compared to girls. In contrast, Deosaran<sup>19</sup> reported a nearly equal association for both genders. Hence, the study explores the possible moderation of gender.

RQ: Does gender influence the association between family SES and students' self-concept?

Demographic variables such as race, family structure, and school type could not be included as moderators because only a few studies reported on these variables or analyzed the relationship between SES and self-concept for these variables.

### ***Methodological Moderators***

Studies have measured SES in various ways; some have used multiple indicators or composite indices (e.g.,<sup>20-22</sup>), and others have relied on a single indicator (e.g.,<sup>23-25</sup>). Notably, research employing multiple indicators has revealed variation in the magnitude of the relationship depending on the specific indicator used<sup>26-28</sup>. Hence, comparing studies that use different measurement approaches may help explain the observed variability in the association between SES and self-concepts.

RQ: Does the measurement of family SES influence the strength of association between family SES and self-concept?

Researchers have studied various domains of self-concepts, with some focusing on specific domains like mathematics<sup>20,29</sup> or language<sup>14,22</sup>. Others have employed broader generic domains like academic self-concept<sup>30,31</sup> or general self-concept<sup>32,33</sup>. The reported variability in the relationship between SES and self-concept across these studies warrants an investigation into how this association differs by domain of self-concept. Accordingly, this study includes a comparison to examine the relationship between SES and self-concept across various self-concept domains.

RQ: Does the strength of association between SES and self-concept vary for various kinds/domains of self-concept?

### ***Macro/Study Level Moderators***

The studies included in this meta-analysis covered more than 100 countries and regions across six continents, providing significant geographic and cultural diversity. This diversity raises the question: could the national or regional economic status moderate the association between family SES and self-concept? We examine the national or regional economic status from two primary perspectives. First, since one of the two major variables of the present study is SES, which includes the family economy as one of the most important constituents, therefore, it is likely that the national/regional economy can influence in determining family SES and its outcomes. Second, existing literature indicates that national/regional economic status is linked to students' academic outcomes. For instance, Chiu and Klassens<sup>34</sup> multi-country investigation showed that mathematics self-concept was more strongly associated with academic achievement for students of wealthier economies. Hence, we included the national economy as a moderator variable:

RQ: Does the economic status of the country or region moderate the strength of association between family SES and self-concept?

Furthermore, the literature includes both primary studies (e.g., <sup>35-37</sup>) and secondary data analyses (e.g., <sup>38-40</sup>). Given the different nature and scope of these two research types, comparing them is essential to ensure the robustness of our findings.

RQ: Does the association between family SES and students' self-concept differ based on the type of data, i.e., primary or secondary data?

Previous research has suggested that families' SES impact on students has weakened over time (e.g., <sup>41,42</sup>); however, other contradicts these findings, suggesting a more persistent influence <sup>43-45</sup>. Consequently, it is important to determine whether the relationship between SES and self-concept has evolved over time.

RQ: Has the strength of association between family SES and students' self-concept changed over time?

## **Supplement 1b: Discussion on the Role of Specific SES Indicators**

A separate analysis was conducted for the studies that used single indicators to determine which single factor yielded the strongest association. The results indicate that the relationship between SES and self-concept is strongest for resources at home, followed by parental education and parental occupation, with family income showing the weakest association. Given that the present study focused on students, for whom academic self-concept is the most prominent. The highest effect size for resources at home is unsurprising because most of the academic self-concepts are showing higher association (e.g., science, social science, scholastic), on which resources at home play a vital role. Previous research indicates that the number of books at home (a main component of resources at home), but not the family teaching activities, mediated the impact of SES on children's reading ability <sup>46</sup>. Furthermore, numerous studies have shown that books at home have a significant direct effect on students' academic achievement (e.g., <sup>47</sup>). However, this effect may be underestimated due to greater error in estimating books at home among low-achieving students <sup>48</sup>.

Furthermore, parental education yielded a higher effect size than both family income and parental occupation. This finding aligns with previous meta-analyses that emphasize the relative importance of parental education over other SES indicators <sup>26,41,49</sup>. Parents' education likely influences academic self-concepts directly (through tutoring from parents) or indirectly (through role modelling). Research has also confirmed the intergenerational transmission of education; for example, Fleury and Gilles <sup>50</sup> found that this transmission accounts for around 15 percent of variance. In India and China—the world's two largest developing nations—increasing the average years of education for the first generation had a lasting impact on educational attainment for the second generation <sup>51,52</sup>. Consequently, higher parental

education level appears to positively influence their children's self-concept, particularly in education-related self-concept.

Parental occupation yielded a lower effect size than parental education but a higher than family income. This finding contradicts previous meta-analyses<sup>45,53</sup>, which suggested the supremacy of parents' occupation over parents' education and family income. The result suggests that the occupational status may not influence self-concept directly but rather indirectly through other modes like household resources, books, etc. Furthermore, family income exhibited the lowest effect size among all the SES indicators. This aligns with several previous meta-analyses, which concluded that family income is the least predictive indicator in comparison to any other SES indicators (e.g.,<sup>54,55</sup>). Many scholars have expressed their reservation regarding income indicator due to the potential inaccuracy of self-reported family annual income. In many cases, children are either unaware of their family's sources of income or are reluctant to disclose them, which may be a reason why family income is not showing a strong association with self-concept. Another possibility is that while parental education and family resources (especially educational resources) can directly shape self-concept, family income can only influence it indirectly.

## Supplement 1c: Discussion on the Role of Specific Self-Concept Domains

Regarding specific self-concept domains, significant differences were observed in the magnitude of the association. Consistent with the results of generic classification, effect sizes were larger for academic-related domains such as science, social sciences, and scholastic self-concept, with the notable exception of math and verbal self-concept. Math self-concept, investigated in one third of the samples, showed an effect size significantly below the other educational self-concepts and the overall effect size. One possibility is that, unlike other academic self-concepts, mathematical ability is seen more as an innate ability (e.g., <sup>56</sup>), like physical ability or intelligence, resulting in an effect size closer to those domains than to science, social science, or academic self-concept. Furthermore, achievement in mathematics does not require many resources, like sciences; therefore, making it less dependent on family SES.

Studies using general self-concept yielded a similar effect size to the overall effect size. However, studies where various domains of self-concept were combined, i.e., composite self-concept, showed a smaller effect size than the general self-concept and overall effect size. This finding suggests that an accumulation of various domains of self-concepts does not reflect general self-concept. A potential explanation is that the composite self-concept aggregates diverse domains that are fundamentally different in nature; many of them are non-academic aspects of the self-concept. Consequently, combining these different domains may dilute the overall effect size, resulting in a smaller effect size than the general self-concept.

Non-academic self-concepts, except for social self-concept, exhibited significantly lower effect sizes than both academic and general/global self-concepts. One explanation for this disparity is that many non-academic self-concepts are related to interpersonal relationships (e.g., peers or parental relationships) and personal traits (e.g., appearance and physical ability), whereas SES may not have much of a role to play. For instance, in the case

of physical self-concept, the effect size was just .069, and in the case of appearance, it was hardly .032. This pattern aligns with numerous individual studies<sup>57-59</sup>. Overall, the results suggest that academic self-concepts, which are mostly related to acquired abilities, are connected more with family SES than non-academic self-concepts that are mostly based on non-acquired attributes like intelligence, appearance, athlete, etc.

Interestingly, social self-concept showed the third-highest effect size among all the specific self-concept domains. That is much higher than any other non-academic self-concept and even overall self-concept, and a few domains of academic self-concept. This indicates that low SES can be particularly damaging to a student's social self-concept. The results suggest that the habitus fostered by family SES<sup>60,61</sup> or the mindset shaped by their class identity<sup>62,63</sup> significantly influence a student's perception of their social skills. One possible explanation is that SES or class identity inherently provides individuals with an understanding of their social standing in the surrounding world. Consequently, low SES may cause students to perceive themselves as less socially accepted agents, which in turn diminishes their social self-concept.

## **Supplement 1d: Discussion on the Role of Study/Macro Level Moderation**

### ***National Economy***

The present study also aimed to determine whether the association between SES and self-concept varies between countries with developing and developed economies. While the effect size for studies from developing countries/regions was slightly larger than that from developed countries/regions, meta-regression revealed no significant moderation effect of national economy on the overall association. Although previous cross-country investigations have shown that the national economy plays a significant role in students' academic outcomes (e.g., <sup>34,64</sup>), the present study did not find any meaningful effect on the SES and self-concept link. This suggests that while the national economy may influence the family finances and students' academic attainments, it does not alter how family SES shapes students' self-concept. In other words, family SES appears to influence student self-concept almost equally across different national economic contexts.

### ***Relationship Over Time***

Additionally, we examined whether the relationship between SES and self-concept has changed over time. The result shows near-zero correlation with the years of data collection, indicating that the strength of this relationship has remained indifferent with reference to time. Meta-regression also further confirmed that the year of data collection has no significant effect on the association between SES and self-concept. While some previous research suggested that the impact of family SES on students has weakened over time (e.g., <sup>41,42</sup>), other evidence supports a more persistent influence <sup>43-45</sup>. Our findings demonstrate that the link between SES and self-concept has not diminished, suggesting that SES remains as critical today in shaping students' self-concept as it was several decades ago. This indicates that the social reality around SES has remained largely unchanged, particularly inside the schools/colleges' premises.

### ***Primary and Secondary Data Type***

One of the moderators examined in this meta-analysis was data type, i.e., whether the data was collected for the study (primary data) or whether scholars had used secondary databases. While the result of individual moderator analysis indicated significant moderation, meta-regression revealed an insignificant effect of data type on the association between SES and self-concept. That is, although the effect size was slightly larger in the case of primary data than secondary data-based samples, the difference between them is not significant. This finding suggests that the influence of SES on self-concept remains consistent regardless of whether the study utilizes small-scale primary data or large-scale secondary big data.

## References

- 1 Battle, J. & Lewis, M. The increasing significance of class: The relative effects of race and socioeconomic status on academic achievement. *Journal of Poverty* **6**, 21-35 (2002). [https://doi.org:10.1300/J134v06n02\\_02](https://doi.org:10.1300/J134v06n02_02)
- 2 Chen, E., Matthews, K. A. & Boyce, W. T. Socioeconomic differences in children's health: how and why do these relationships change with age? *Psychological Bulletin* **128**, 295-329 (2002). <https://doi.org:10.1037//0033-2909.128.2.295>
- 3 Jacobs, J. E., Lanza, S., Osgood, D. W., Eccles, J. S. & Wigfield, A. Changes in children's self-competence and values: Gender and domain differences across grades one through twelve. *Child Development* **73**, 509-527 (2002). <https://doi.org:10.1111/1467-8624.00421>
- 4 Hurtado, S. Graduate school racial climates and academic self-concept among minority graduate students in the 1970s. *American Journal of Education* **102**, 330-351 (1994).
- 5 Hascoët, M., Giaconi, V. & Jamain, L. Family socioeconomic status and parental expectations affect mathematics achievement in a national sample of Chilean students. *International Journal of Behavioral Development* **45**, 122-132 (2021). <https://doi.org:10.1177/0165025420965731>
- 6 Byrne, B. M. & Shavelson, R. J. On the structure of adolescent self-concept. *Journal of Educational Psychology* **78**, 474-481 (1986). <https://doi.org:10.1037/0022-0663.78.6.474>
- 7 Marshall, H. H. The development of self-concept. *Young Children* **44**, 44-51 (1989).
- 8 Stake, J. E. Gender differences and similarities in self-concept within everyday life contexts. *Psychology of Women Quarterly* **16**, 349-363 (1992). <https://doi.org:10.1111/j.1471-6402.1992.tb00259.x>
- 9 Dai, D. Y. A comparison of gender differences in academic self-concept and motivation between high-ability and average Chinese adolescents. *Journal of Secondary Gifted Education* **13**, 22-32 (2001). <https://doi.org:10.4219/jsge-2001-361>
- 10 Espinoza, A. M. & Taut, S. Gender and psychological variables as key factors in mathematics learning: A study of seventh graders in Chile. *International Journal of Educational Research* **103**, 101611 (2020). <https://doi.org:10.1016/j.ijer.2020.101611>
- 11 Marsh, H. W. & Yeung, A. S. Longitudinal Structural Equation Models of Academic Self-Concept and Achievement: Gender Differences in the Development of Math and English Constructs. *American Educational Research Journal* **35**, 705-738 (1998). <https://doi.org:10.2307/1163464>
- 12 Skaalvik, S. & Skaalvik, E. M. Gender differences in math and verbal self-concept, performance expectations, and motivation. *Sex Roles* **50**, 241-252 (2004). <https://doi.org:10.1023/B:SERS.0000015555.40976.e6>
- 13 Sullivan, A. Academic self-concept, gender and single-sex schooling. *British Educational Research Journal* **35**, 259-288 (2009). <https://doi.org:10.1080/01411920802042960>
- 14 Andersen, I. G. & Smith, E. Social Contexts and Gender Disparities in Students' Competence Beliefs: The Role of Gender-Stereotypical Beliefs and Achievement Patterns in the Classroom for Students' Self-Concept in Gender-Stereotypical Subjects. *Frontiers in Education* **7** (2022). <https://doi.org:10.3389/feduc.2022.840618>
- 15 Fiedler, I., Buchholz, S. & Schaeper, H. Does gender composition in a field of study matter? Gender disparities in college students' academic self-concepts. *Research in Higher Education* **65**, 1491-1513 (2024). <https://doi.org:10.1007/s11162-024-09794-7>

- 16 Garcia, F. *et al.* Validation of the Five-Factor Self-Concept Questionnaire AF5 in Brazil. *Frontiers in Psychology* **9**, e2250 (2018). <https://doi.org/10.3389/fpsyg.2018.02250>
- 17 Sabando-García, A. R. *et al.* Measurement through structural equations of the self-concept instrument in high-school students. *Frontiers in Education* **9**, 1507106 (2025). <https://doi.org/10.3389/educ.2024.1507106>
- 18 Chavous, T. M., Rivas-Drake, D., Smalls, C., Griffin, T. & Cogburn, C. Gender matters, too: the influences of school racial discrimination and racial identity on academic engagement outcomes among African American adolescents. *Developmental Psychology* **44**, 637-654 (2008). <https://doi.org/10.1037/0012-1649.44.3.637>
- 19 Deosaran, R. A. *Social class, self-concept, and educational expectations: A social - psychological study*, University of Toronto, (1977).
- 20 Arens, A. K. *et al.* Math self-concept, grades, and achievement test scores: Long-term reciprocal effects across five waves and three achievement tracks. *Journal of Educational Psychology* **109**, 621-634 (2017). <https://doi.org/10.1037/edu0000163>
- 21 Chevalère, J. *et al.* The influence of socioeconomic status, working memory and academic self-concept on academic achievement. *European Journal of Psychology of Education* (2022). <https://doi.org/10.1007/s10212-022-00599-9>
- 22 Heyder, A., Kessels, U. & Steinmayr, R. Explaining academic-track boys' underachievement in language grades: Not a lack of aptitude but students' motivational beliefs and parents' perceptions? *British Journal of Educational Psychology* **87**, 205-223 (2017). <https://doi.org/10.1111/bjep.12145>
- 23 Degé, F., Wehrum, S., Stark, R. & Schwarzer, G. Music lessons and academic self-concept in 12-to 14-year-old children. *Musicae Scientiae* **18**, 203-215 (2014). <https://doi.org/10.1177/1029864914523283>
- 24 Lauermann, F., Meißner, A. & Steinmayr, R. Relative importance of intelligence and ability self-concept in predicting test performance and school grades in the math and language arts domains. *Journal of Educational Psychology* **112**, 364-383 (2020). <https://doi.org/10.1037/edu0000377>
- 25 Rodríguez-Rodríguez, D. & Guzmán, R. Academic performance of secondary education students in socio-familial risk contexts. *Suma Psicológica* **28**, 104-111 (2021). <https://doi.org/10.14349/sumapsi.2021.v28.n2.5>
- 26 Basarkod, G., Marsh, H. W., Parker, P. D., Dicke, T. & Guo, J. The immigrant paradox and math self-concept: An SES-of-origin-country hypothesis. *Learning and Instruction* **77** (2022). <https://doi.org/10.1016/j.learninstruc.2021.101539>
- 27 Fejgin, N. Participation in high school competitive sports: A subversion of school mission or contribution to academic goals? *Sociology of Sport Journal* **11**, 211-230 (1994). <https://doi.org/10.1123/ssj.11.3.211>
- 28 Jiang, S. & Simpkins, S. D. Examining changes in adolescents' high school math and science motivational beliefs and their relations to parental STEM support and STEM major choice at the intersectionality of gender and college generation status. *Developmental Psychology* **60**, 693-710 (2024). <https://doi.org/10.1037/dev0001683>
- 29 Marsh, H. W. Extending the reciprocal effects model of math self-concept and achievement: Long-term implications for end-of-high-school, age-26 outcomes, and long-term expectations. *Journal of Educational Psychology* **115**, 193-211 (2023). <https://doi.org/10.1037/edu0000750>
- 30 Postigo, Á., Fernández-Alonso, R., Fonseca-Pedrero, E., González-Nuevo, C. & Muñiz, J. Academic self-concept dramatically declines in secondary school: Personal

- and contextual determinants. *International Journal of Environmental Research and Public Health* **19** (2022). <https://doi.org/10.3390/ijerph19053010>
- 31 Li, S., Xu, Q. & Xia, R. Relationship between SES and academic achievement of  
junior high school students in China: The mediating effect of self-concept. *Frontiers  
in Psychology* **10** (2020). <https://doi.org/10.3389/fpsyg.2019.02513>
- 32 Klein-Sosa, J. & Renk, K. Social acceptance as a moderator in the relationship  
between socioeconomic status and the psychological adjustment of ethnically diverse  
early adolescents. *Journal of Ethnic & Cultural Diversity in Social Work* **25**, 130-152  
(2016). <https://doi.org/10.1080/15313204.2015.1132180>
- 33 Trusty, J., Watts, R. E. & House, G. Relationship between self-concept and  
achievement for African American preadolescents. *The Journal of Humanistic  
Education and Development* **35**, 29-39 (1996). <https://doi.org/10.1002/j.2164-4683.1996.tb00350.x>
- 34 Chiu, M. M. & Klassen, R. M. Relations of mathematics self-concept and its  
calibration with mathematics achievement: Cultural differences among fifteen-year-  
olds in 34 countries. *Learning and Instruction* **20**, 2-17 (2010).  
<https://doi.org/10.1016/j.learninstruc.2008.11.002>
- 35 Acar, Ö. Investigation of the science achievement models for low and high achieving  
schools and gender differences in Turkey. *Journal of Research in Science Teaching*  
**56**, 649-675 (2019). <https://doi.org/10.1002/tea.21517>
- 36 Biyik, M. A., Erdogan, T. & Yildiz, M. The examining reading motivation of primary  
students in the terms of some variables. *International Journal of Progressive  
Education* **13**, 31-49 (2017).
- 37 Vollmer, J., Lohmann, J. & Giess-Stüber, P. Socioeconomic status and global  
physical self-concept of adolescents: A multilevel structural equation modeling  
approach. *German Journal of Exercise and Sport Research* **51**, 160-169 (2021).  
<https://doi.org/10.1007/s12662-020-00701-7>
- 38 Chiu, M. M., McBride-Chang, C. & Lin, D. Ecological, psychological, and cognitive  
components of reading difficulties: Testing the component model of reading in fourth  
graders across 38 countries. *Journal of Learning Disabilities* **45**, 391-405 (2012).  
<https://doi.org/10.1177/0022219411431241>
- 39 DeVries, J. M., Szardenings, C., Doebler, P. & Gebhardt, M. Subject-specific self-  
concept and global self-esteem mediate risk factors for lower competency in  
mathematics and reading. *Social Sciences* **10**, 11 (2021).  
<https://doi.org/10.3390/socsci10010011>
- 40 Guo, J., Marsh, H. W., Parker, P. P., Morin, A. J. S. & Yeung, A. S. Expectancy-value  
in mathematics, gender and socioeconomic background as predictors of achievement  
and aspirations: A multi-cohort study. *Learning and Individual Differences* **37**, 161-  
168 (2015). <https://doi.org/10.1016/j.lindif.2015.01.008>
- 41 Liu, J., Peng, P. & Luo, L. The relation between family socioeconomic status and  
academic achievement in China: A meta-analysis. *Educational Psychology Review*  
**32**, 49-76 (2020). <https://doi.org/10.1007/s10648-019-09494-0>
- 42 Wang, Y. & Zhang, Q. Are American children and adolescents of low socioeconomic  
status at increased risk of obesity? Changes in the association between overweight and  
family income between 1971 and 2002. *The American Journal of Clinical Nutrition*  
**84**, 707-716 (2006). <https://doi.org/10.1093/ajcn/84.4.707>
- 43 Broer, M., Bai, Y. & Fonseca, F. *Socioeconomic inequality and educational  
outcomes*. Vol. 5 (Springer International Publishing, 2019).
- 44 Elgar, F. J. *et al.* Socioeconomic inequalities in adolescent health 2002-2010: a time-  
series analysis of 34 countries participating in the Health Behaviour in School-aged

- Children study. *The Lancet* **385**, 2088-2095 (2015). [https://doi.org:10.1016/S0140-6736\(14\)61460-4](https://doi.org:10.1016/S0140-6736(14)61460-4)
- 45 Liu, J., Peng, P., Zhao, B. & Luo, L. Socioeconomic status and academic achievement in primary and secondary education: A meta-analytic review. *Educational Psychology Review* **34**, 2867-2896 (2022). <https://doi.org:10.1007/s10648-022-09689-y>
- 46 Li, Y., Gao, M., Yu, Y., Zhang, S. & Yang, X. Influence of socioeconomic status on children's reading abilities: the mediating role of home learning environment and the moderating role of grade level. *BMC Psychology* **13** (2025). <https://doi.org:10.1186/s40359-025-03203-z>
- 47 Runge, J. M., Hagemeyer, B., Neyer, F. J. & Engeser, S. Transgenerational Transmission: An Investigation of Parents' Achievement Motives, Achievement Imagery in Children's Books and Children's Academic Performance. *Journal of Research in Personality* **115** (2025). <https://doi.org:10.1016/j.jrp.2024.104569>
- 48 Eriksson, K., Lindvall, J., Helenius, O. & Ryve, A. Higher-achieving children are better at estimating the number of books at home: Evidence and implications. *Frontiers in Psychology* **13** (2022). <https://doi.org:10.3389/fpsyg.2022.1026387>
- 49 Jheng, Y. J., Lin, C. W., Chang, J. C. C. & Liao, Y. K. Who is able to choose? A meta-analysis and systematic review of the effects of family socioeconomic status on school choice. *International Journal of Educational Research* **112** (2022). <https://doi.org:10.1016/j.ijer.2022.101943>
- 50 Fleury, N. & Gilles, F. The intergenerational transmission of education: A meta-regression analysis. *Education Economics* **26**, 557-573 (2018). <https://doi.org:10.1080/09645292.2018.1517863>
- 51 Azam, M. & Bhatt, V. Like Father, Like Son? Intergenerational Educational Mobility in India. *Demography* **52**, 1929-1959 (2015). <https://doi.org:10.1007/s13524-015-0428-8>
- 52 Gu, X., Hua, S., McKenzie, T. & Zheng, Y. Like father, like son? Parental input, access to higher education, and social mobility in China. *China Economic Review* **72** (2022). <https://doi.org:10.1016/j.chieco.2022.101761>
- 53 Selvitopu, A. & Kaya, M. A meta-analytic review of the effect of socioeconomic status on academic performance. *Journal of Education* **203**, 768-780 (2023). <https://doi.org:10.1177/00220574211031978>
- 54 Sirin, S. R. Socioeconomic status and academic achievement: A meta-analytic review of research. *Review of Educational Research* **75**, 417-453 (2005). <https://doi.org:10.3102/00346543075003417>
- 55 Tan, C. Y. Socioeconomic status and student learning: Insights from an umbrella review. *Educational Psychology Review* **36**, 100 (2024). <https://doi.org:10.1007/s10648-024-09929-3>
- 56 Mazzocco, M. M., Feigenson, L. & Halberda, J. Preschoolers' precision of the approximate number system predicts later school mathematics performance. *PLoS one* **6**, e23749 (2011). <https://doi.org:10.1371/journal.pone.0023749>
- 57 Aal-Hussain, A. *A study of academic achievement, socioeconomic status, intelligence: Gender, and their relations to general and academic self-concept of twelfth grade students in the United Arab Emirates*, University of Hull, (1991).
- 58 Givol, L. *Longitudinal association between parenting perceptions in early childhood and self-concept in early adolescence: the mediating role of self-concept in early childhood*, University of Haifa, Israel, (2024).
- 59 Marsh, H. W. & Parker, J. W. Determinants of student self-concept: Is it better to be a relatively large fish in a small pond even if you don't learn to swim as well? *Journal*

- of Personality and Social Psychology* **41**, 213-231 (1984).  
<https://doi.org:10.1037/0022-3514.47.1.213>
- 60 Bodovski, K. Adolescents' emerging habitus: the role of early parental expectations and practices. *British Journal of Sociology of Education* **35**, 389-412 (2014).  
<https://doi.org:10.1080/01425692.2013.776932>
- 61 Bourdieu, P. in *Weight of the world: social suffering in contemporary society* (eds P. Bourdieu *et al.*) 507-513 (Polity Press, 1999).
- 62 Destin, M. & Oyserman, D. From assets to school outcomes: How finances shape children's perceived possibilities and intentions. *Psychological Science* **20**, 414-418 (2009). <https://doi.org:10.1111/j.1467-9280.2009.02309.x>
- 63 Oyserman, D. & Lewis, N. A. Seeing the destination and the path: Using identity-based motivation to understand and reduce racial disparities in academic achievement. *Social Issues and Policy Review* **11**, 159-194 (2017).  
<https://doi.org:10.1111/sipr.12030>
- 64 Kim, S. W., Cho, H. & Kim, L. Y. Socioeconomic status and academic outcomes in developing countries: A meta-analysis. *Review of Educational Research* **89**, 875-916 (2019). <https://doi.org:10.3102/0034654319877155>
