# Supplementary material
Source: Research Square preprint supplement (doi:10.21203/rs.3.rs-9869749/v1)
Supplement: Supplementary file 2 [file c0df17adbf1140e490252980.pdf]

**Table 1***The Effect Size for Overall, Moderator, and Subgroup Analysis*

| Variable                       | <i>n</i> | <i>k</i> | Effect size ( <i>r</i> ) | 95% CI    |           | <i>Z</i> | <i>p</i> | <i>I</i> <sup>2</sup> <sub>s</sub> | <i>I</i> <sup>2</sup> <sub>k</sub> | <i>Q</i>         | <i>QM</i>          |
|--------------------------------|----------|----------|--------------------------|-----------|-----------|----------|----------|------------------------------------|------------------------------------|------------------|--------------------|
|                                |          |          |                          | <i>LL</i> | <i>UL</i> |          |          |                                    |                                    |                  |                    |
| Overall                        | 129      | 245      | .107                     | .093      | .123      | 14.421   | <.001    | 74.839                             | 23.276                             | 8006.743         |                    |
| Age (k = 235)                  |          |          |                          |           |           |          |          |                                    |                                    |                  | 202.008<br>(<.001) |
| Children                       | 46       | 88       | .107                     | .079      | .136      | 7.3481   | <.001    | 65.166                             | 27.853                             | 803.417 (<.001)  |                    |
| Early adolescence              | 38       | 58       | .118                     | .095      | .142      | 9.753    | <.001    | 72.611                             | 25.827                             | 2167.280 (<.001) |                    |
| Late adolescence               | 32       | 60       | .102                     | .076      | .130      | 7.504    | <.001    | 71.930                             | 26.685                             | 2536.757 (<.001) |                    |
| Adult                          | 10       | 29       | .067                     | .021      | .114      | 2.828    | .005     | 69.895                             | 4.666                              | 75.7093 (<.001)  |                    |
| SES two category (k = 242)     |          |          |                          |           |           |          |          |                                    |                                    |                  | 218.469<br>(<.001) |
| Composite indicator            | 48       | 98       | .128                     | .104      | .154      | 10.078   | <.001    | 62.647                             | 35.817                             | 2403.551 (<.001) |                    |
| Single indicator               | 78       | 144      | .091                     | .074      | .108      | 10.523   | <.001    | 75.903                             | 21.083                             | 2313.876 (<.001) |                    |
| SES single (k = 145)           |          |          |                          |           |           |          |          |                                    |                                    |                  | 132.985<br>(<.001) |
| Resources at home              | 19       | 20       | .105                     | .069      | .141      | 5.767    | <.001    | 86.309                             | 9.800                              | 329.671 (<.001)  |                    |
| Parents' Education             | 32       | 41       | .104                     | .085      | .125      | 10.125   | <.001    | 11.873                             | 77.411                             | 353.976 (<.001)  |                    |
| Parents' Occupation            | 30       | 39       | .082                     | .059      | .105      | 7.003    | <.001    | 63.648                             | 33.813                             | 468.758 (<.001)  |                    |
| Family Income                  | 23       | 45       | .071                     | .031      | .111      | 3.451    | <.001    | .93.227                            | 0.000                              | 186.897 (<.001)  |                    |
| Self-concept generic (k = 245) |          |          |                          |           |           |          |          |                                    |                                    |                  | 211.412<br>(<.001) |
| General/global SC              | 20       | 23       | .091                     | .050      | .133      | 4.362    | <.001    | .000                               | 89.891                             | 132.939 (<.001)  |                    |
| Academic SC                    | 103      | 169      | .112                     | .097      | .128      | 14.147   | <.001    | 73.418                             | 25.103                             | 7577.263 (<.001) |                    |
| Non-Academic SC                | 15       | 53       | .074                     | .025      | .123      | 2.948    | .003     | 66.626                             | 13.612                             | 276.018 (<.001)  |                    |

|                                 |     |     |      |       |      |        |       |        |        |                  |                    |
|---------------------------------|-----|-----|------|-------|------|--------|-------|--------|--------|------------------|--------------------|
| Self-concept specific (k = 245) |     |     |      |       |      |        |       |        |        |                  | 231.528<br>(<.001) |
| Science SC                      | 8   | 10  | .158 | .130  | .188 | 10.673 | <.001 | 41.374 | 48.920 | 108.069 (<.001)  |                    |
| Social Science SC               | 4   | 8   | .162 | .101  | .226 | 5.098  | <.001 | 55.381 | 21.391 | 27.581 (<.001)   |                    |
| Verbal SC                       | 24  | 32  | .076 | .045  | .108 | 4.765  | <.001 | 22.155 | 76.036 | 1144.124 (<.001) |                    |
| Social SC                       | 4   | 5   | .132 | .023  | .243 | 2.363  | <.001 | 83.068 | 0.000  | 14.961 (.005)    |                    |
| Scholiastic SC                  | 51  | 63  | .119 | .093  | .146 | 8.796  | <.001 | 94.169 | 2.963  | 1232.448 (<.001) |                    |
| Composite SC                    | 6   | 8   | .073 | -.004 | .150 | 1.853  | .0464 | .000   | 52.264 | 15.240 (.033)    |                    |
| General SC                      | 11  | 11  | .106 | .040  | .174 | 3.129  | .002  | 45.904 | 45.904 | 102.946 (<.001)  |                    |
| Music SC                        | 5   | 5   | .108 | .042  | .212 | 2.040  | .041  | 35.935 | 35.935 | 18.449 (.001)    |                    |
| Math SC                         | 39  | 55  | .093 | .074  | .112 | 9.586  | <.001 | 86.301 | 11.660 | 2222.028 (<.001) |                    |
| Physical SC                     | 4   | 5   | .069 | -.062 | .200 | 1.037  | .300  | 80.834 | 3.258  | 21.223 (<.001)   |                    |
| Appearance SC                   | 3   | 5   | .032 | -.032 | .096 | 0.984  | .325  | 0.000  | 0.000  | 1.188 (.880)     |                    |
| Intelligence SC                 | 3   | 3   | .051 | -.027 | .130 | 1.293  | .196  | 32.086 | 32.086 | 5.935 (.051)     |                    |
| Other SC                        | 9   | 35  | .057 | .005  | .108 | 2.164  | .030  | 40.877 | 27.085 | 83.701 (<.001)   |                    |
| Country economy (k = 239)       |     |     |      |       |      |        |       |        |        |                  | 189.757<br>(<.001) |
| Developing                      | 23  | 40  | .119 | .079  | .161 | 5.732  | <.001 | 95.216 | 2.942  | 946.191 (<.001)  |                    |
| Developed                       | 102 | 199 | .104 | .088  | .120 | 12.645 | <.001 | 69.771 | 24.510 | 2221.402 (<.001) |                    |
| Data type (k = 245)             |     |     |      |       |      |        |       |        |        |                  | 209.874<br>(<.001) |
| Primary data                    | 76  | 143 | .115 | .094  | .137 | 10.374 | <.001 | 66.723 | 15.466 | 917.2615 (<.001) |                    |
| Secondary data                  | 53  | 102 | .099 | .081  | .119 | 10.281 | <.001 | 68.548 | 30.437 | 7016.986 (<.001) |                    |

*Note.*  $n$  = number of independent samples/datasets,  $k$  = number of effect sizes,  $CI$  = confidence interval.  $I^2_s$  &  $I^2_k$  showed the total variation due to the samples and effect sizes, respectively.  $Q$  showed overall heterogeneity.  $Q_M$  is the moderation effect. The significant  $Q_M$  indicates significant moderation. Some studies do not have data (NA = not available for analysis) for various variables; therefore, the moderation analysis included only those studies where data were available.  $p^* < .05$ ,  $** < .01$ ,  $*** < .001$

**Table 2***Results of Meta-Regression Analysis*

| Variable                               | Coefficient | Standard error | 95% CI |        | Z       | p     | R <sup>2</sup> |
|----------------------------------------|-------------|----------------|--------|--------|---------|-------|----------------|
|                                        |             |                | LL     | UL     |         |       |                |
| Year                                   | .0003       | .0005          | -.0007 | 0.0012 | 0.5599  | .5756 | .0000          |
| Female Percentage                      | .0001       | .0002          | -.0003 | .0005  | 0.4235  | .6719 | .2195          |
| Age                                    |             |                |        |        |         |       |                |
| Early Adolescents vs. Children         | .0067       | .0185          | -.0296 | .0429  | 0.3609  | .7182 | .0358          |
| Late Adolescents vs. Children          | -.0234      | .0191          | -.0608 | .0141  | -1.225  | .2215 |                |
| Adults vs. Children                    | -.0406      | .0263          | -.0922 | .0110  | -1.5426 | .1229 |                |
| Late Adolescents vs. Early Adolescents | -.0301      | .0191          | -.0674 | .0073  | -1.5750 | .1152 |                |
| Adults vs. Early Adolescents           | -.0473      | .0263          | -.0986 | .0040  | -1.8074 | .0707 |                |
| Adults vs. Late Adolescents            | -.0172      | .0274          | -.0365 | .0710  | -0.6287 | .5295 |                |
| SES measures                           |             |                |        |        |         |       |                |
| Single Vs. Composite indicators        | -.0352      | .0158          | -.0663 | .1505  | -2.223  | .0262 | .0588          |
| Self-Concept                           |             |                |        |        |         |       |                |
| General/Global SC vs Academic SC       | -.0133      | .0205          | -.0536 | .0269  | -0.6494 | .5161 | .0100          |
| General/Global SC vs. Non-academic SC  | .0281       | .0251          | -.0210 | .0773  | 1.1219  | .2619 |                |
| Academic SC vs. Non-academics SC       | .0415       | .0188          | .0046  | .0784  | 2.2022  | .0277 |                |
| Country Economy                        |             |                |        |        |         |       |                |
| Developing vs Developed                | -.0109      | .0197          | -.0496 | .0278  | 0.5524  | .5801 | .0000          |
| Data Type                              |             |                |        |        |         |       |                |
| Secondary vs. Primary                  | -.0209      | .0152          | -.0506 | .0088  | -1.3772 | .1684 | .0046          |

*Note.* N = 115, k = 227. Total R<sup>2</sup> = .3686. In each comparison, the second category was taken as the reference category.

**Table 3***Brief Description of the Studies Included in the Meta-Analysis*

| S. No. | Author(s), year of publication  | Data year | Number of participants | Percentage of female | Age groups        | Country/Region | Economy type | Data type | Self-concept Domain              | SES measure | <i>r</i> |
|--------|---------------------------------|-----------|------------------------|----------------------|-------------------|----------------|--------------|-----------|----------------------------------|-------------|----------|
| 1      | Aal-Hussain (1991) <sup>#</sup> | 1989      | 334                    | 52.994               | Adult             | UAE            | Developing   | Primary   | ASC, VSC, MSC, AppSC, PhSC, OSCs | Composite   | 0.019    |
| 2      | Acar (2019), a                  | 2015      | 320                    | NA                   | Early adolescence | Turkey         | Developing   | Primary   | SSC                              | Composite   | 0.170    |
| 3      | Acar (2019), b                  | 2015      | 241                    | NA                   | Early adolescence | Turkey         | Developing   | Primary   | SSC                              | Composite   | 0.210    |
| 4      | Aktop (2010)                    | NA        | 198                    | 48.990               | Early adolescence | Turkey         | Developing   | Primary   | ComSC                            | Composite   | 0.008    |
| 5      | Allen (1978) a                  | 1974      | 22                     | 0                    | Late adolescence  | USA            | Developed    | Primary   | ASC                              | FI, PE, PO  | -0.177   |
| 6      | Allen (1978) b                  | 1974      | 39                     | 0                    | Late adolescence  | USA            | Developed    | Primary   | ASC                              | FI, PE, PO  | 0.131    |
| 7      | Andersen & Smith (2022)         | 2019      | 934                    | 49.893               | NA                | Denmark        | Developed    | Primary   | MSC                              | Composite   | 0.099    |
| 8      | Areepattamannil et al. (2023)   | 2019      | 7915                   | 50                   | Early adolescence | UAE            | Developing   | Secondary | SSC                              | HR          | 0.150    |
| 9      | Arikan et at. (2025)            | 2019      | 3988                   | 49.7                 | Early adolescence | Turkey         | Developing   | Secondary | SSC                              | Composite   | 0.210    |
| 10     | Bardach et al. (2023), a        | NA        | 606                    | 45.2                 | Children          | Germany        | Developed    | Secondary | ASC                              | PO          | 0.030    |
| 11     | Bardach et al. (2023), b        | NA        | 556                    | 45.2                 | Children          | Germany        | Developed    | Secondary | ASC                              | PO          | 0.030    |
| 12     | Bardach et al. (2023), c        | NA        | 853                    | 45.2                 | Children          | Germany        | Developed    | Secondary | ASC                              | PO          | 0.060    |

|    |                            |      |        |        |                   |                 |               |           |                 |            |        |
|----|----------------------------|------|--------|--------|-------------------|-----------------|---------------|-----------|-----------------|------------|--------|
| 13 | Basarkod et al. (2022), a  | 2003 | 12551  | 48.857 | Late adolescence  | Australia       | Developed     | Secondary | MSC             | PE, PO, HR | 0.103  |
| 14 | Basarkod et al. (2022), b  | 2012 | 14481  | 48.857 | Late adolescence  | Australia       | Developed     | Secondary | MSC             | PE, PO, HR | 0.100  |
| 15 | Bauer et al. (2023)        |      | 316    | 86.39  | Adult             | Germany         | Developed     | Primary   | OSC             | FI, HR     | -0.065 |
| 16 | Becker et al. (2024)       | 2011 | 3906   | 48.2   | Children          | Germany         | Developed     | Secondary | ASC, VSC, MSC   | FI, PO     | 0.072  |
| 17 | Bergold & Steinmayr (2023) | NA   | 1032   | 47.8   | Late adolescence  | Germany         | Developed     | Secondary | MSC, VSC        | PE, PO     | 0.048  |
| 18 | Biyik et al. (2017)        | NA   | 769    | 48.635 | Children          | Turkey          | Developing    | Primary   | VSC             | NA         | 0.266  |
| 19 | Bledsoe & Dixon (1980)     | NA   | 400    | 50     | NA                | USA             | Developed     | Secondary | OSC, PhSC, SoSC | FI         | 0.223  |
| 20 | Carrier (1981)#            | NA   | 253    | 48.22  | Children          | USA             | Developed     | Primary   | MSC             | PE         | 0.179  |
| 21 | Chang et al. (2007)        | 1988 | 12144  | 54.002 | Early adolescence | USA             | Developed     | Secondary | GSC             | Composite  | 0.110  |
| 22 | Chappell (1979)#           | NA   | 102    | 58.82  | Late adolescence  | USA             | Developed     | Primary   | ComSC           | PO         | -0.029 |
| 23 | Chavous et al. (2008)      | 1996 | 410    | 50.244 | Late adolescence  | USA             | Developed     | Primary   | ASC             | Composite  | 0.030  |
| 24 | Chen & Lu (2022), a        | 2019 | 1146   | 45.899 | Early adolescence | Hongkong, China | Developing    | Secondary | MSC             | HR         | -0.010 |
| 25 | Chen & Lu (2022), b        | 2019 | 1981   | 53.306 | Early adolescence | UK              | Developed     | Secondary | MSC             | HR         | 0.100  |
| 26 | Chiu et al. (2012)         | NA   | 186725 | 49.000 | Children          | 38 Countries    | Multi-Country | Secondary | MSC             | Composite  | 0.160  |
| 27 | Coelho (1981)#             | NA   | 383    | 47.52  | Children          | USA             | Developed     | Primary   | GSC             | PO         | 0.134  |

|    |                             |      |       |        |                   |             |            |           |          |           |        |
|----|-----------------------------|------|-------|--------|-------------------|-------------|------------|-----------|----------|-----------|--------|
| 28 | Das et al. (2024)           | NA   | 100   | 40     | Early adolescence | India       | Developing | Primary   | ASC      | PE        | 0.140  |
| 29 | DeFreitas & Rinn (2013)     | NA   | 167   | 79.641 | Adult             | USA         | Developed  | Primary   | VSC, MSC | FI        | -0.085 |
| 30 | Deosaran (1977)             | NA   | 1324  | 52.266 | Early adolescence | Canada      | Developed  | Primary   | ASC      | PO        | 0.155  |
| 31 | Dumont et al. (2012), a     | NA   | 1911  | 47.724 | Children          | Switzerland | Developed  | Primary   | ASC      | HR        | 0.030  |
| 32 | Dumont et al. (2012), b     | NA   | 1274  | 51.334 | Children          | Germany     | Developed  | Primary   | ASC      | HR        | 0.140  |
| 33 | Eckert et al. (2025) a      | 2018 | 416   | NA     | Children          | Germany     | Developed  | Primary   | OSC      | HR        | 0.030  |
| 34 | Eckert et al. (2025) b      | 2018 | 306   | NA     | Children          | Germany     | Developed  | Primary   | OSC      | HR        | 0.090  |
| 35 | Eshel & Klein (1981)        | NA   | 2199  | NA     | Children          | Israel      | Developed  | Secondary | ASC      | Composite | -0.125 |
| 36 | Fagan (1978)#               | NA   | 1725  | 47.6   | Children          | Canada      | Developed  | Primary   | GSC      | Composite | 0.251  |
| 37 | Fleischmann et al. (2023) a | 2012 | 14812 | 47     | Early adolescence | Austria     | Developed  | Secondary | ASC      | PO        | 0.070  |
| 38 | Fleischmann et al. (2023) b | 2017 | 63518 | 48     | Early adolescence | Austria     | Developed  | Secondary | ASC      | PO        | 0.130  |
| 39 | Fleischmann et al. (2023) c | 2010 | 1302  | 53     | Adult             | Germany     | Developed  | Secondary | ASC      | PO        | 0.090  |
| 40 | Fleischmann et al. (2023) d | 2011 | 900   | 56     | Adult             | Germany     | Developed  | Secondary | ASC      | PO        | 0.120  |
| 41 | Franklin (1978)# a          | NA   | 248   | 51.21  | Children          | USA         | Developed  | Primary   | GSC      | FI        | 0.095  |
| 42 | Franklin (1978)# b          | NA   | 321   | 50.5   | Early adolescence | USA         | Developed  | Primary   | GSC      | FI        | 0.096  |

|    |                           |      |        |        |                   |              |               |           |                         |           |       |
|----|---------------------------|------|--------|--------|-------------------|--------------|---------------|-----------|-------------------------|-----------|-------|
| 43 | Fu et al. (1980)          | NA   | 432    | 100    | Children          | USA          | Developed     | Primary   | GSC                     | FI        | 0.097 |
| 44 | Geng et al. (2022)        | 2018 | 612004 | 49.829 | Late adolescence  | 80 Countries | Multi-Country | Secondary | VSC                     | Composite | 0.187 |
| 45 | Givol (2024)#             | NA   | 156    | 53.85  | Children          | Israel       | Developed     | Primary   | AppSC, SoSC, ComSC, OSC | FI, PE    | 0.066 |
| 46 | Gnas et al. (2024)        | NA   | 1516   | 48.8   | Children          | Germany      | Developed     | Secondary | ASC                     | PE        | 0.150 |
| 47 | Gogol et al. (2014)       | 2011 | 3879   | 49.007 | Early adolescence | Luxembourg   | Developed     | Primary   | GSC, VSC, MSC           | Composite | 0.056 |
| 48 | Guay et al. (2004) a      | 1989 | 71     | NA     | Children          | Canada       | Developed     | Primary   | ASC                     | FI        | 0.180 |
| 49 | Guay et al. (2004) b      | 1989 | 86     | NA     | Children          | Canada       | Developed     | Primary   | ASC                     | FI        | 0.100 |
| 50 | Guay et al. (2004) c      | 1990 | 83     | NA     | Children          | Canada       | Developed     | Primary   | ASC                     | FI        | 0.250 |
| 51 | Guo et al. (2015) a       | 1999 | 5179   | 49.295 | Early adolescence | Hongkong     | Developing    | Secondary | MSC                     | Composite | 0.087 |
| 52 | Guo et al. (2015) b       | 2003 | 4972   | 50.402 | Early adolescence | Hongkong     | Developing    | Secondary | MSC                     | Composite | 0.083 |
| 53 | Hare (1980)               | 1980 | 513    | NA     | Children          | USA          | Developed     | Primary   | ASC                     | PO        | 0.289 |
| 54 | Hascoët et al. (2021)     | 2011 | 157814 | 51.665 | Early adolescence | Chile        | Developing    | Secondary | MSC                     | PE, FI    | 0.040 |
| 55 | Heyder et al. (2017)      | 2006 | 520    | 58.077 | Late adolescence  | Germany      | Developed     | Primary   | VSC                     | Composite | 0.010 |
| 56 | Hilz et al. (2022)        | NA   | 202    | 50.5   | Children          | Germany      | Developed     | Primary   | MSC                     | PE        | 0.120 |
| 57 | Hollenstein et al. (2024) | NA   | 509    | 49.7   | Children          | Switzerland  | Developed     | Secondary | MSC                     | Composite | 0.230 |

|    |                           |      |       |        |                   |         |            |           |                |           |        |
|----|---------------------------|------|-------|--------|-------------------|---------|------------|-----------|----------------|-----------|--------|
| 58 | Holzer et al. (2025)      | NA   | 171   | 50.9   | Early adolescence | France  | Developed  | Primary   | ASC            | Composite | 0.100  |
| 59 | Ivcevic & Kaufman (2013)  | NA   | 3289  | 72.089 | Adult             | USA     | Developed  | Primary   | ISC, OSC       | Composite | 0.088  |
| 60 | Jaekel et al. (2024)      | NA   | 3179  | 51.4   | Children          | Germany | Developed  | Primary   | VSC            | FI, HR    | 0.110  |
| 61 | Jiang et al. (2020)       | 2009 | 14040 | 51.460 | Early adolescence | USA     | Developed  | Secondary | SSC, MSC       | FI, PE    | 0.088  |
| 62 | Johannsen et al. (2024) a | 2005 | 1508  | 50.5   | Early adolescence | Germany | Developed  | Secondary | VSC, MSC       | PO        | 0.015  |
| 63 | Johannsen et al. (2024) b | 2021 | 19783 | 49.9   | Late adolescence  | Germany | Developed  | Secondary | VSC, MSC       | PO        | 0.085  |
| 64 | Jones (1977)#             | NA   | 98    | 0      | Children          | USA     | Developed  | Primary   | ComSC          | Composite | 0.151  |
| 65 | Kahraman et al. (2022)    | 2011 | 6928  | 49.307 | Early adolescence | Turkey  | Developing | Secondary | SSC            | Composite | 0.170  |
| 66 | Kelz & Krammer, 2024      | 2017 | 203   | 51.23  | Children          | Austria | Developed  | Primary   | MSC            | PE, PO    | 0.080  |
| 67 | Klapp (2018)              | 1980 | 8558  | 49.439 | Early adolescence | Sweden  | Developed  | Secondary | VSC, MSC, SoSC | Composite | 0.106  |
| 68 | Klein-Sosa & Renk (2016)  | NA   | 278   | 41.727 | Children          | USA     | Developed  | Primary   | GSC            | Composite | 0.230  |
| 69 | Kohlmeier (2024)          | 2013 | 4109  | 56.61  | Early adolescence | Germany | Developed  | Secondary | ASC            | HR, PO    | -0.005 |
| 70 | Koivuhovi et al. (2022)   | 2010 | 950   | 52.704 | Children          | Finland | Developed  | Secondary | MSC            | PE        | -0.020 |
| 71 | Kovács et al. (2025) a    | NA   | 155   | 55.5   | Children          | Hungary | Developed  | Primary   | MuSC           | PE        | 0.134  |
| 72 | Kovács et al. (2025) b    | NA   | 143   | 55.5   | Children          | Hungary | Developed  | Primary   | MuSC           | PE        | 0.119  |

|    |                           |      |        |        |                   |              |               |           |                                  |           |        |
|----|---------------------------|------|--------|--------|-------------------|--------------|---------------|-----------|----------------------------------|-----------|--------|
| 73 | Kovács et al. (2025)<br>c | NA   | 132    | 55.5   | Children          | Hungary      | Developed     | Primary   | MuSC                             | PE        | -0.015 |
| 74 | Kovács et al. (2025)<br>d | NA   | 156    | 55.5   | Early adolescence | Hungary      | Developed     | Primary   | MuSC                             | PE        | -0.015 |
| 75 | Lauremann et al. (2020)   | 2014 | 1067   | 52.202 | Early adolescence | Germany      | Developed     | Primary   | VSC, MSC                         | PO        | 0.100  |
| 76 | Li et al. (2020)          | NA   | 345    | 47.536 | Early adolescence | China        | Developing    | Primary   | GSC                              | Composite | 0.128  |
| 77 | Li et al. (2024)          | NA   | 812    | 49.75  | Children          | China        | Developing    | Primary   | GSC                              | FI        | -0.149 |
| 78 | Liou et al. (2024)        | 2019 | 3857   | 49.8   | Early adolescence | South Korea  | Developed     | Secondary | MSC, SSC                         | PE, HR    | 0.178  |
| 79 | Lloyd (2013) <sup>#</sup> | NA   | 156    | 0.000  | Late adolescence  | USA          | Developed     | Primary   | ASC                              | PE        | -0.045 |
| 80 | Lu et al. (2022)          | 2019 | 2221   | 41.648 | Children          | China        | Developing    | Primary   | ComSC                            | Composite | 0.147  |
| 81 | Luo & Guan (2025)         | 2023 | 12155  | 48.2   | NA                | China        | Developing    | Primary   | MuSC                             | HR        | 0.222  |
| 82 | Maqsud & Rouhani (1991)   | NA   | 135    | 57.037 | Late adolescence  | South Africa | Developing    | Primary   | GSC                              | Composite | 0.130  |
| 83 | Marsh (1987)              | 1974 | 2213   | NA     | Late adolescence  | USA          | Developed     | Secondary | ASC                              | Composite | 0.334  |
| 84 | Marsh (1991)              | 1980 | 14825  | NA     | Late adolescence  | USA          | Developed     | Secondary | GSC, ASC                         | Composite | 0.165  |
| 85 | Marsh et al. (2006)       | 2000 | 107899 | NA     | Late adolescence  | 25 Countries | Multi-Country | Secondary | VSC, MSC, ASC                    | Composite | 0.110  |
| 86 | Marsh et al. (2023)       | 2002 | 16197  | NA     | Late adolescence  | USA          | Developed     | Secondary | ASC                              | Composite | 0.220  |
| 87 | Marsh & Parker (1984)     | 1981 | 305    | 47.869 | Children          | Australia    | Developed     | Primary   | MSC, AppSc, PhSc, VSC, SoSC, OSC | Composite | 0.030  |

|     |                                        |      |        |        |                   |              |               |           |               |           |       |
|-----|----------------------------------------|------|--------|--------|-------------------|--------------|---------------|-----------|---------------|-----------|-------|
| 88  | Mohammadpour & Abdul Ghafar (2014)     | 2007 | 217728 | 50.184 | Early adolescence | 48 Countries | Multi-Country | Secondary | MSC           | Composite | 0.111 |
| 89  | Montoro (2023)#                        | NA   | 979    | 73     | Adult             | USA          | Developed     | Primary   | ASC           | PE, PO    | 0.105 |
| 90  | Mortimer et al. (2017) a               | 1989 | 265    | 74.717 | Late adolescence  | USA          | Developed     | Primary   | VSC, ISC, OSC | FI        | 0.027 |
| 91  | Mortimer et al. (2017) b               | 2011 | 422    | 53.318 | Late adolescence  | USA          | Developed     | Primary   | VSC, ISC, OSC | FI        | 0.037 |
| 92  | Morton et al. (2024)                   | NA   | 182    | 45.1   | Children          | USA          | Developed     | Primary   | ASC           | FI        | 0.320 |
| 93  | Myint & Robnett, (2024)                | NA   | 629    | 51     | Late adolescence  | USA          | Developed     | Primary   | OSC           | PE        | 0.083 |
| 94  | Østbø & Zachrisson (2022)              | 2015 | 1819   | NA     | Children          | Norway       | Developed     | Primary   | MSC           | HR        | 0.160 |
| 95  | Paschke et al. (2020)                  | 2014 | 284    | 56.338 | Late adolescence  | Germany      | Developed     | Primary   | VSC, MSC      | PE        | 0.073 |
| 96  | Paschke et al. (2023)                  | 2016 | 504    | 52.6   | Late adolescence  | Germany      | Developed     | Secondary | MSC           | PE, HR    | 0.080 |
| 97  | Postigo et al. (2022)                  | 2009 | 7379   | 47.405 | Children          | Spain        | Developed     | Primary   | ASC           | Composite | 0.227 |
| 98  | Raju & Asfaw (2009)                    | NA   | 497    | 50.101 | Early adolescence | Ethiopia     | Developing    | Primary   | ASC           | Composite | 0.070 |
| 99  | Rinn et al. (2013)                     | NA   | 499    | 25.251 | Adult             | USA          | Developed     | Primary   | MSC           | PE        | 0.115 |
| 100 | Rodríguez-Rodríguez & Guzmán (2021), a | NA   | 305    | NA     | Late adolescence  | Spain        | Developed     | Primary   | ASC           | PE        | 0.160 |
| 101 | Rodríguez-Rodríguez & Guzmán (2021) b  | NA   | 991    | NA     | Late adolescence  | Spain        | Developed     | Primary   | ASC           | PE        | 0.145 |

|     |                              |      |       |        |                   |         |           |           |           |           |        |
|-----|------------------------------|------|-------|--------|-------------------|---------|-----------|-----------|-----------|-----------|--------|
| 102 | Sáinz & Upadyaya, (2024) a   | NA   | 807   | 50.2   | Early adolescence | Spain   | Developed | Primary   | SsSC      | Composite | 0.235  |
| 103 | Sáinz & Upadyaya, (2024) b   | NA   | 796   | 50.2   | Early adolescence | Spain   | Developed | Primary   | SsSC      | Composite | 0.115  |
| 104 | Sáinz & Upadyaya, (2024) c   | NA   | 796   | 50.2   | Late adolescence  | Spain   | Developed | Primary   | SsSC      | Composite | 0.105  |
| 105 | Sáinz & Upadyaya, (2024) d   | NA   | 864   | 50.2   | Late adolescence  | Spain   | Developed | Primary   | SsSC      | Composite | 0.190  |
| 106 | Schiele et al. (2025)        | NA   | 369   | 51     | Children          | Germany | Developed | Primary   | OSC       | Composite | -0.020 |
| 107 | Schoon et al. (2025)         | 2004 | 15770 | 49.1   | Early adolescence | UK      | Developed | Secondary | ASC       | PE, PO    | 0.106  |
| 108 | Schotte et al. (2022)        | 2012 | 4722  | 50.191 | Late adolescence  | Germany | Developed | Secondary | MSC       | Composite | 0.120  |
| 109 | Shalev (2024)                | NA   | 208   | NA     | Children          | Israel  | Developed | Primary   | VSC       | NA        | 0.175  |
| 110 | Sheehan & Hadfield (2024)    | 2006 | 1715  | 53.59  | Children          | Ireland | Developed | Secondary | ASC       | FI        | 0.094  |
| 111 | Smith (1978)# a              | 1977 | 202   | 52     | Children          | USA     | Developed | Primary   | VSC, MSC, | FI        | 0.093  |
| 112 | Smith (1978)# b              | 1977 | 236   | 53     | Children          | USA     | Developed | Primary   | VSC, MSC, | FI        | 0.085  |
| 113 | Sojourner & Kushner (1997)## | 1990 | 1868  | 50.428 | Late adolescence  | USA     | Developed | Secondary | GSC       | NA        | 0.055  |
| 114 | Stang-Rabrig et al. (2023)   | 2017 | 1028  | 46.7   | Late adolescence  | USA     | Developed | Secondary |           | PO        | 0.110  |
| 115 | Suárez-Álvarez et al. (2014) | 2011 | 7729  | 52.801 | Early adolescence | Spain   | Developed | Primary   | ASC       | Composite | 0.310  |
| 116 | Szumski & Karwowski (2019)   | NA   | 1488  | 48.992 | Early adolescence | Poland  | Developed | Primary   | ASC, MSC  | Composite | 0.166  |

|     |                               |      |       |        |                   |         |            |           |       |            |        |
|-----|-------------------------------|------|-------|--------|-------------------|---------|------------|-----------|-------|------------|--------|
| 117 | Trusty et al. (1996)          | NA   | 563   | 47.069 | Children          | USA     | Developed  | Secondary | ComSC | Composite  | 0.076  |
| 118 | Tulagan & Eccles, (2022)      | NA   | 786   | 48     | Early adolescence | USA     | Developed  | Primary   | ASC   | Composite  | 0.120  |
| 119 | Vasalampi et al. (2023)       | 2016 | 1351  | 52     | Late adolescence  | Finland | Developed  | Secondary | VSC   | PE, PO     | -0.010 |
| 120 | Vollmer et al. (2021)         | 2016 | 966   | 54.244 | Early adolescence | Germany | Developed  | Primary   | PhSC  | Composite  | 0.096  |
| 121 | von Keyserlingk et al. (2020) | 1996 | 2624  | 62     | Adult             | Germany | Developed  | Secondary | ASC   | Composite  | 0.060  |
| 122 | Walberg & Tsai (1983)         | 1978 | 2300  | 48.522 | Late adolescence  | USA     | Developed  | Secondary | VSC   | PE         | 0.170  |
| 123 | Wang (2023)                   | 2012 | 2275  | 50.33  | Late adolescence  | USA     | Developed  | Secondary | MSC   | PE, PO, HR | 0.095  |
| 124 | Weller & Levi (1981)          | NA   | 122   | NA     | Children          | Israel  | Developed  | Primary   | ComSC | PO         | 0.050  |
| 125 | Xu (2023)                     | NA   | 1072  | 51.3   | Early adolescence | China   | Developing | Primary   | MSC   | PE         | 0.250  |
| 126 | Yang & Xia (2023)             | NA   | 998   | 49.1   | Children          | China   | Developing | Primary   | ASC   | Composite  | 0.147  |
| 127 | Yildirim & Yildirim (2019)    | 2012 | 4848  | 50.990 | Late adolescence  | Turkey  | Developing | Secondary | MSC   | Composite  | 0.070  |
| 128 | Zhang et al. (2022)           | 2015 | 14291 | 49.990 | Early adolescence | USA     | Developed  | Secondary | SSC   | HR         | 0.170  |
| 129 | Zhao et al. (2023)            | NA   | 1524  | 76.2   | Adult             | China   | Developing | Primary   | ASC   | Composite  | 0.178  |

*Note.* # = PhD Thesis, ## = Conference proceeding. NA = Not available. SSC = Science self-concept, ASC = Academic self-concept, VSC = Verbal self-concept, SoSC = Social self-concept, GSC = General self-concept, MSC = Math self-concept, ISC = Intelligence self-concept, PhSC = Physical self-concept, AppSC = Appearance self-concept, MuSC = Musical self-concept, ComSC = composite SC, SsSC = Social Science SC. OSC = Other self-concept. FI = Family Income, PE = Parental education, PO = Parental occupation, HR = Home resources.
